# Supplementary material for: How geographic access to care shapes disease burden: The current impact of post-exposure prophylaxis and potential for expanded access to prevent human rabies deaths in Madagascar
Source: PubMed Central journal article supplement (PMC8102000; doi:10.1371/journal.pntd.0008821), 2021-04-26
Supplement: pntd.0008821.s007.pdf [file pntd.0008821.s007.pdf]

## S7 Text. Details on software packages used

### *How geographic access to care shapes disease burden: the current impact of post-exposure prophylaxis and potential for expanded access to prevent human rabies deaths in Madagascar*

Rajeev et al. 2021✉

#### Table of Contents

|                 |   |
|-----------------|---|
| References..... | 1 |
|-----------------|---|

✉ Correspondence: [Rajeev et al. 2021](#) <[mrajeev@princeton.edu](mailto:mrajeev@princeton.edu)>

Our analyses relied on a number of open-source software packages for the R programming language [1] including the following: coda [2], cowplot [3], data.table [4], doParallel [5], doRNG [6], dplyr [7], fasterize [8], forcats [9], foreach [10], gdistance [11], ggbeeswarm [12], ggforce [13], ggh4x [14], ggplot2 [15], ggridges [16], ggsn [17], glue [18], here [19], igraph [20], iterators [21], lubridate [22], magrittr [23], Matrix [24], patchwork [25], raster [26], readr [27], rgdal [28], rjags [29], rmapshaper [30], Rmpi [31], rngtools [32], scales [33], sf [34], sp [35], tidyr [36], triangle [37], RLang2019 [1]. For full details on implementation please see the archived repositories on [Zenodo](#) or on [Github](#).

#### References

1. R Core Team. R: A language and environment for statistical computing. Vienna, Austria: R Foundation for Statistical Computing; 2019. Available: <https://www.R-project.org/>
2. Plummer M, Best N, Cowles K, Vines K, Sarkar D, Bates D, et al. Coda: Output analysis and diagnostics for MCMC. 2019. Available: <https://CRAN.R-project.org/package=coda>

3. Wilke CO. Cowplot: Streamlined plot theme and plot annotations for 'ggplot2'. 2020. Available: <https://CRAN.R-project.org/package=cowplot>
4. Dowle M, Srinivasan A. Data.table: Extension of 'data.frame'. 2020. Available: <https://CRAN.R-project.org/package=data.table>
5. Corporation M, Weston S. doParallel: Foreach parallel adaptor for the 'parallel' package. 2019. Available: <https://CRAN.R-project.org/package=doParallel>
6. Gaujoux R. doRNG: Generic reproducible parallel backend for 'foreach' loops. 2020. Available: <https://CRAN.R-project.org/package=doRNG>
7. Wickham H, François R, Henry L, Müller K. Dplyr: A grammar of data manipulation. 2020. Available: <https://CRAN.R-project.org/package=dplyr>
8. Ross N. Fasterize: Fast polygon to raster conversion. 2020. Available: <https://CRAN.R-project.org/package=fasterize>
9. Wickham H. Forcats: Tools for working with categorical variables (factors). 2020. Available: <https://CRAN.R-project.org/package=forcats>
10. Revolution Analytics, Weston S. Foreach: Provides foreach looping construct.
11. van Etten J. Gdistance: Distances and routes on geographical grids. 2020. Available: <https://CRAN.R-project.org/package=gdistance>
12. Clarke E, Sherrill-Mix S. Ggbeeswarm: Categorical scatter (violin point) plots. 2017. Available: <https://CRAN.R-project.org/package=ggbeeswarm>
13. Pedersen TL. Ggforce: Accelerating 'ggplot2'. 2020. Available: <https://CRAN.R-project.org/package=ggforce>
14. van den Brand T. ggh4x: Hacks for 'ggplot2'. 2020. Available: <https://github.com/teunbrand/ggh4x>

15. Wickham H, Chang W, Henry L, Pedersen TL, Takahashi K, Wilke C, et al. ggplot2: Create elegant data visualisations using the grammar of graphics. 2020. Available: <https://CRAN.R-project.org/package=ggplot2>
16. Wilke CO. Ggridges: Ridgeline plots in 'ggplot2'. 2020. Available: <https://CRAN.R-project.org/package=ggridges>
17. Santos Baquero O. Ggsn: North symbols and scale bars for maps created with 'ggplot2' or 'ggmap'. 2019. Available: <https://CRAN.R-project.org/package=ggsn>
18. Hester J. Glue: Interpreted string literals. 2020. Available: <https://CRAN.R-project.org/package=glue>
19. Müller K. Here: A simpler way to find your files. 2017. Available: <https://CRAN.R-project.org/package=here>
20. file. SA. Igraph: Network analysis and visualization. 2020. Available: <https://CRAN.R-project.org/package=igraph>
21. Analytics R, Weston S. Iterators: Provides iterator construct. 2019. Available: <https://CRAN.R-project.org/package=iterators>
22. Spinu V, Grolemund G, Wickham H. Lubridate: Make dealing with dates a little easier. 2020. Available: <https://CRAN.R-project.org/package=lubridate>
23. Bache SM, Wickham H. Magrittr: A forward-pipe operator for r. 2014. Available: <https://CRAN.R-project.org/package=magrittr>
24. Bates D, Maechler M. Matrix: Sparse and dense matrix classes and methods. 2019. Available: <https://CRAN.R-project.org/package=Matrix>
25. Pedersen TL. Patchwork: The composer of plots. 2020. Available: <https://CRAN.R-project.org/package=patchwork>
26. Hijmans RJ. Raster: Geographic data analysis and modeling. 2020. Available: <https://CRAN.R-project.org/package=raster>

27. Wickham H, Hester J, Francois R. Readr: Read rectangular text data. 2018. Available: <https://CRAN.R-project.org/package=readr>
28. Bivand R, Keitt T, Rowlingson B. Rgdal: Bindings for the 'geospatial' data abstraction library. 2020. Available: <https://CRAN.R-project.org/package=rgdal>
29. Plummer M. Rjags: Bayesian graphical models using MCMC. 2019. Available: <https://CRAN.R-project.org/package=rjags>
30. Teucher A, Russell K. Rmapshaper: Client for 'mapshaper' for 'geospatial' operations. 2020. Available: <https://CRAN.R-project.org/package=rmapshaper>
31. Yu H. Rmpi: Interface (wrapper) to MPI (message-passing interface). 2018. Available: <https://CRAN.R-project.org/package=Rmpi>
32. Gaujoux R. Rngtools: Utility functions for working with random number generators. 2020. Available: <https://CRAN.R-project.org/package=rngtools>
33. Wickham H, Seidel D. Scales: Scale functions for visualization. 2020. Available: <https://CRAN.R-project.org/package=scales>
34. Pebesma E. Sf: Simple features for r. 2020. Available: <https://CRAN.R-project.org/package=sf>
35. Bivand RS, Pebesma E, Gomez-Rubio V. Applied spatial data analysis with R, second edition. Springer, NY; 2013. Available: <https://asdar-book.org/>
36. Wickham H. Tidy: Tidy messy data. 2020. Available: <https://CRAN.R-project.org/package=tidyr>
37. Carnell R. Triangle: Provides the standard distribution functions for the triangle distribution. 2019. Available: <https://CRAN.R-project.org/package=triangle>
